# Supplementary material for: A Machine Learning Approach to the Interpretation of Cardiopulmonary Exercise Tests: Development and Validation
Source: Pulm Med. 2021 May 31;2021:5516248. doi: 10.1155/2021/5516248 (PMC8188599; doi:10.1155/2021/5516248)
Supplement: Supplementary 3 — s-Table 3. Comparisons of CPET results (actual and % of predicted) among the three studied groups—the learning stage. [file 5516248.f3.docx]

| **Variables** | **CHF (n=50)** | | **COPD (n=50)** | | **Healthy (n=50)** | |
| --- | --- | --- | --- | --- | --- | --- |
| **Measureda** | **% of pred.d** | **Measuredb** | **% of pred.e** | **Measured****c** | **% of pred.f** |
| **Time [min]** | 9.3±2.4**b** | 90.4±9.5 | 10.9±2.4**a** | 95.7±16.5 | 9.9±1.8 | 91.8±8.1 |
| **Peak WR [watt]** | 83.5±35.0**bc** | 43.8±13.0**f** | 57.7±19.3**ac** | 42.6±10.8**f** | 180.2±27.1**ab** | 90.7±6.8**de** |
| **Peak VO2 [l/min]** | 1.1±0.3**c** | 45.2±13.1**ef** | 1.2±0.4**c** | 60.0±15.7**df** | 2.5±0.2**ab** | 92.2±9.8**de** |
| **Peak VCO2 [l/min]** | 1.1±0.4**c** | 35.8±10.6**ef** | 1.1±0.5**c** | 43.5±15.0**df** | 3.1±0.5**ab** | 88.9±7.1**de** |
| **RER** | 1.08±0.06**c** | 85.0±4.3**f** | 1.08±0.07**c** | 85.0±4.8**f** | 1.19±0.09**ab** | 92.7±6.6**de** |
| **Peak VO2/kg [ml/kg/min]** | 13.3±4.2**bc** | 42.2±9.7**ef** | 16.9±3.7**ac** | 64.3±10.1**df** | 32.4±4.7**ab** | 91.0±6.5**de** |
| **VO2/WR slope** | 7.6±1.0**bc** | 71.1±8.0**ef** | 10.4±1.1**a** | 90.4±6.0**d** | 10.2±1.2**a** | 89.2±7.4**d** |
| **Peak HR [beat/min]** | 103.7±13.1**bc** | 50.8±6.1**ef** | 114.0±14.3**ac** | 58.8±6.4**df** | 175.1±10.2**ab** | 91.1±7.0**de** |
| **Peak O2Pulse [(ml/kg/beat)x100]** | 12.1±1.9**bc** | 65.9±8.4**ef** | 13.8±2.5**ac** | 80.4±11.2**df** | 19.0±2.1**ab** | 93.5±6.7**de** |
| **BR [l]** | 51.8±19.4**bc** | 109.4±15.6**ef** | -1.6±13.3**ac** | 66.7±10.7**df** | 27.4±10.7**ab** | 89.7±7.1**de** |
| **Peak VE [l/min]** | 51.5±15.8**bc** | 51.8±13.1**f** | 44.4±10.1**ac** | 55.9±10.4**f** | 98.5±13.0**ab** | 90.1±6.1**de** |
| **Peak Vt [l/min]** | 1.3±0.3**bc** | 48.0±9.5**f** | 1.2±0.2**ac** | 46.5±8.0**f** | 2.6±0.2**ab** | 90.6±5.6**de** |
| **Peak Bf [1/min]** | 35.2±5.5**bc** | 69.9±10.0**ef** | 31.5±3.9**ac** | 63.0±7.7**df** | 47.6±5.2**ab** | 90.1±7.4**de** |
| **Peak VE/VO2** | 42.5±6.2**c** | 96.7±11.7**ef** | 40.1±6.0 | 89.2±10.1**d** | 39.5±4.7**a** | 91.8±8.4**d** |
| **Peak VE/VCO2** | 42.0±5.4**bc** | 125.1±16.9**ef** | 37.6±4.9**ac** | 108.0±14.1**df** | 28.4±2.7**ab** | 87.6±7.1**de** |
| **Peak PETO2 [mmHg]** | 113.8±4.8**bc** | 85.6±5.7**ef** | 108.3±5.7**ac** | 79.6±5.3**df** | 118.5±6.8**ab** | 90.8±7.2**de** |
| **Peak PETCO2 [mmHg]** | 34.8±3.7**b** | 92.0±9.6**e** | 38.6±5.1**ac** | 101.8±13.1**df** | 33.5±2.6**b** | 88.8±6.6**e** |
| **VAT % of pred. VO2/kg [%]** | 34.3±5.0**bc** | 60.9±8.9**ef** | 48.4±9.8**ac** | 80.1±9.1**df** | 60.2±9.2**ab** | 90.1±6.8**de** |
| **ECG grading [%]** | N/A | 79.6±12.2**ef** | N/A | 99.2±3.4**df** | N/A | 89.8±7.6**de** |
| **O2Pulse response grading [%]** | N/A | 74.4±12.2**ef** | N/A | 86.2±6.6**df** | N/A | 91.4±6.9**de** |
| **SaO2 [%]** | 97.8±1.5**bc** | 98.7±2.6**ef** | 88.5±4.9**ac** | 80.1±9.1**df** | 93.5±3.4**ab** | 89.0±7.0**de** |
| **VE/VCO2 slope** | 38.1±3.8**bc** | 130.3±11.3**ef** | 31.9±5.1**ac** | 105.6±16.6**df** | 25.4±2.4**ab** | 90.2±7.4**de** |
| **FVC [l]** | 3.6±0.8**bc** | 80.7±10.3**ef** | 2.5±0.5**ac** | 67.7±8.8**df** | 4.5±0.7**ab** | 90.2±7.5**de** |
| **FEV1 [l/sec]** | 2.8±0.6**bc** | 78.3±10.3**ef** | 1.2±0.2**ac** | 43.0±6.0**df** | 3.7±0.5**ab** | 90.7±6.3**de** |
| **FEV1/FVC [%]** | 88.2±8.8**bc** | 97.3±6.1**ef** | 49.0±4.1**ac** | 64.8±5.2**df** | 77.7±10.9**ab** | 89.1±7.3**de** |

**s-Table 3.** Comparisons of CPET results (actualand % of predicted**)** among the three studied groups – **The learning stage**

Data presented as mean ± SD.

WR **=** Work-Rate; VO2 = Oxygen Consumption; VCO2 = Carbon Dioxide Production; RER **=** Respiratory Exchange Ratio; HR = Heart Rate; O2Pulse = Oxygen Puls; BR = Breathing Reserve; VE = Minute Ventilation; Vt = Tidal Volume; Bf = Breathing Frequency; PETO2 = End-Tidal Oxygen tension; PETCO2 = End-Tidal Carbon Dioxide tension; VAT = Ventilatory Anaerobic Threshold; % predicted = percent of predicted normal value; ECG = Electrocardiography; SaO2 = Oxygen Saturation; FVC = [Forced Vital Capacity](http://medical-dictionary.thefreedictionary.com/forced+vital+capacity); FEV1 = Forced Expiratory Volume in 1 second; CHF = Chronic Heart Failure; COPD = Chronic Obstructive Pulmonary Disease; Healthy = Healthy normal participants.

a Letters a, b, and c, represent significant differences (P < 0.05) related to measured values between the specified groups.

b Letters d, e, and f, represent significant differences (P < 0.05) related to % of predicted values between the specified groups.

O2pulse response grading (% of predicted normal): Up-sloping 90%, flat 50%, down-sloping 30% [1, 2].

ECG (%) changes in ECG tracings were classified based on clinical severity: Normal 100%, nonspecific changes 80%, specific T-wave changes 75%, ventricular conduction defects 70%, atrial arrhythmia 60%, ST depression (>2 mm) 50%, ventricular arrhythmia 40%, ST elevation (>2 mm) 30%**.**
