# Supplementary material for: A Machine Learning Approach to the Interpretation of Cardiopulmonary Exercise Tests: Development and Validation
Source: Pulm Med. 2021 May 31;2021:5516248. doi: 10.1155/2021/5516248 (PMC8188599; doi:10.1155/2021/5516248)
Supplement: Supplementary 4 — s-Table 4. Comparisons of CPET results (actual and % of predicted) among the three studied groups—the validation stage. [file 5516248.f4.docx]

**s-Table 4.** Comparisons of CPET results (actualand % of predicted**)** among the three studied groups – **The validation stage**

| **Variables** | **CHF (n=23)** | | **COPD (n=25)** | | **Healthy (n=36)** | |
| --- | --- | --- | --- | --- | --- | --- |
| **Measureda** | **% of pred.d** | **Measuredb** | **% of pred.e** | **Measuredc** | **% of pred.f** |
| **Time [min]** | 8.1±1.8**bc** | 86.0±5.2**ef** | 12.2±2.1**a** | 101.5±14.8**d** | 12.2±2.7**a** | 104.2±18.2**d** |
| **Peak WR [watt]** | 74.7±38.1**c** | 40.9±16.2**f** | 57.6±21.1**c** | 43.7±18.5**f** | 175.7±84.1**ab** | 98.0±32.1**de** |
| **Peak VO2 [l/min]** | 1.0±0.3**c** | 40.5±10.5**f** | 0.9±0.2**c** | 53.4±14.8**f** | 2.3±1.1**ab** | 86.8±29.4**de** |
| **Peak VCO2 [l/min]** | 1.0±0.4**c** | 31.8±12.8**f** | 1.0±0.2**c** | 42.9±13.6**f** | 2.7±1.1**ab** | 80.5±24.0**de** |
| **RER** | 1.06±0.06**c** | 84.1±4.3**f** | 1.07±0.06**c** | 84.3±3.8**f** | 1.22±0.13**ab** | 94.2±10.1**de** |
| **Peak VO2/kg [ml/kg/min]** | 13.4±5.1**c** | 45.0±17.5**ef** | 18.1±5.9**c** | 68.5±19.3**df** | 41.6±14.2**ab** | 109.3±26.8**de** |
| **Slope VO2/WR** | 9.1±2.7**c** | 81.3±21.9**f** | 9.7±1.7 | 85.7±12.0 | 10.6±2.1**a** | 92.1±14.5**d** |
| **Peak HR [beat/min]** | 99.3±21.4**bc** | 49.0±9.6**ef** | 114.7±16.1**ac** | 59.9±8.6**df** | 164.0±27.0**ab** | 80.1±13.8**de** |
| **Peak O2Pulse [(ml/kg/beat)x100]** | 12.4±4.4**c** | 67.8±25.5**f** | 14.1±4.1**c** | 83.1±21.0**f** | 24.1±7.0**ab** | 114.1±28.0**de** |
| **BR [l]** | 42.2±18.4**bc** | 101.8±14.7**ef** | 17.3±11.1**a** | 81.8±8.9**d** | 24.6±13.1**a** | 87.7±10.5**d** |
| **Peak VE [l/min]** | 45.7±16.7**c** | 47.4±17.9**f** | 46.4±10.6**c** | 58.6±17.3**f** | 98.5±34.0**ab** | 93.5±22.6**de** |
| **Peak Vt [l/min]** | 1.3±0.5**c** | 51.1±32.6**f** | 1.3±0.3**c** | 51.7±11.0**f** | 1.9±0.7**ab** | 78.9±18.2**de** |
| **Peak Bf [1/min]** | 33.3±9.0**c** | 65.8±16.6**f** | 31.3±7.2**c** | 62.2±13.4**f** | 45.5±10.4**ab** | 87.2±17.1**de** |
| **Peak VE/VO2** | 48.7±12.2**bc** | 109.0±26.4**ef** | 40.5±7.2**a** | 89.2±13.4**d** | 40.8±7.4**a** | 94.1±15.3**d** |
| **Peak VE/VCO2** | 46.5±10.2**bc** | 136.5±30.0**ef** | 39.8±7.3**ac** | 112.8±19.6**d** | 33.6±5.3**ab** | 101.1±14.7**d** |
| **Peak PETO2 [mmHg]** | 114.1±5.6**c** | 85.9±6.7 | 110.9±5.3 | 82.3±6.1**f** | 114.6±7.3**a** | 87.0±8.3**e** |
| **Peak PETCO2 [mmHg]** | 33.8±4.8 | 89.6±12.3 | 35.5±4.3 | 93.9±11.1 | 36.7±5.3 | 96.8±13.7 |
| **VAT % of pred. VO2/kg [%]** | 33.3±11.9**bc** | 57.3±17.0**ef** | 49.5±13.7**ac** | 79.9±14.9**df** | 59.0±12.2**ab** | 89.3±10.2**de** |
| **ECG grading [%]** | N/A | 79.6±19.0**ef** | N/A | 97.9±6.1**d** | N/A | 96.7±13.9**d** |
| **O2Pulse response** **grading [%]** | N/A | 71.3±21.9 | N/A | 77.6±19.8 | N/A | 81.7±19.9 |
| **SaO2 [%]** | 97.8±1.6**bc** | 98.7±3.1**ef** | 92.9±3.8**ac** | 88.3±7.7**df** | 95.7±1.8**ab** | 94.3±4.5**de** |
| **Slope VE/VCO2** | 46.2±17.6**bc** | 156.2±57.3**ef** | 38.0±11.3**ac** | 124.4±36.9**d** | 30.3±6.5**ab** | 109.9±23.9**d** |
| **FVC [l]** | 4.0±1.4 | 84.3±19.4 | 3.4±1.0 | 87.5±22.9 | 3.9±0.9 | 83.7±12.0 |
| **FEV1 [l/sec]** | 3.0±1.3**b** | 81.4±24.5**e** | 1.4±0.5**ac** | 53.0±19.7**df** | 3.1±0.9**b** | 80.3±12.3**e** |
| **FEV1/FVC [%]** | 86.2±19.6**b** | 96.7±18.8**e** | 54.5±16.7**ac** | 70.3±17.6**df** | 88.9±15.0**b** | 96.8±11.0**e** |

Data presented as mean ± SD.

See e-Table 2 for expansion abbreviations.

a Letters a, b, and c, represent significant differences (P < 0.05) related to measured values between the specified groups.

b Letters d, e, and f, represent significant differences (P < 0.05) related to % of predicted values between the specified groups.

O2pulse response grading (% of normal): Up-sloping 90%, flat 50%, down-sloping 30%[1, 2].

ECG grading (% of normal), changes in ECG tracings were classified based on clinical severity: Normal 100%, nonspecific changes 80%, specific T-wave changes 75%, ventricular conduction defects 70%, atrial arrhythmia 60%, ST depression (>2 mm) 50%, ventricular arrhythmia 40%, ST elevation (>2 mm) 30%**.**
